# Supplementary material for: Contrasting evidence to reimbursement reality for off-label use (OLU) of drug treatments in cancer care: rationale and design of the CEIT-OLU project
Source: PubMed Central journal article supplement — ESMO Open. 2019 Dec 1;4(6):e000596. doi: 10.1136/esmoopen-2019-000596 (PMC6890379; doi:10.1136/esmoopen-2019-000596), 2019-12-01
Supplement: esmoopen-2019-000596supp001.pdf [file esmoopen-2019-000596supp001.pdf]

| Label                          | Variable        | Variable class | Details                                                                                                                                                      |
|--------------------------------|-----------------|----------------|--------------------------------------------------------------------------------------------------------------------------------------------------------------|
| <b>Patient demographics</b>    |                 |                |                                                                                                                                                              |
| Age                            | age             | Alphanumeric   | Date of birth                                                                                                                                                |
| Sex                            | sex             | Categorical    | M/F                                                                                                                                                          |
| Patient ID                     | pid             | Alphanumeric   | Individual patient hospital number                                                                                                                           |
| <b>Disease characteristics</b> |                 |                |                                                                                                                                                              |
| Disease                        | disease_name    | Alphanumeric   | Disease according to patient record                                                                                                                          |
| Tumor type                     | tumor_type      | Categorical    | "Solid tumor", "Lymphoma" or "Hematological diseases"                                                                                                        |
| Molecular markers              | gbm_marker      | Categorical    | Present molecular characteristics (predictive marker) for Glioblastoma multiforme: "MGMT meth.", "IDH mutations", "other"                                    |
|                                | bc_marker       | Categorical    | Present molecular characteristics (predictive marker) for breast cancer: "Her2/neu", "ER", "PR", "BRCA1/2"                                                   |
|                                | lc_marker       | Categorical    | Present molecular characteristics (predictive marker) for lung cancer: "EGFR mutation", "ALK rearrangement", "ROS1", "KRAS", "BRAF", "PD-L1>50%", "PD-L1>1%" |
|                                | mel_marker      | Categorical    | Present molecular characteristics (predictive marker) for melanoma: "BRAF", "NRAS", "CKIT"                                                                   |
|                                | lymphoma_marker | Categorical    | Present molecular characteristics (predictive marker) for lymphoma and hematological diseases: "CD19", "CD20", "CD30", "CD38", "MYD88", "BCR-ABL", "FLT3"    |
|                                | crc_marker      | Categorical    | Present molecular characteristics (predictive marker) for colorectal cancer: "APC", "p53 loss", "KRAS", "NRAS", "BRAF", "MSI", "PI3K mutation"               |
|                                | gastric_marker  | Categorical    | Present molecular characteristics (predictive marker) for gastric cancer: "Her2/neu", "MSI"                                                                  |
| <b>Request characteristics</b> |                 |                |                                                                                                                                                              |

|                                                          |                        |                      |                                                                                                                                                                                    |
|----------------------------------------------------------|------------------------|----------------------|------------------------------------------------------------------------------------------------------------------------------------------------------------------------------------|
| Date of Request                                          | request_date           | Date<br>(DD.MM.YYYY) | Date on which the request was filed                                                                                                                                                |
| Insurance company                                        | insurance_name         | Alphanumeric         | Respective health insurer of the patient                                                                                                                                           |
| Class of Insurance                                       | insurance_class        | Categorical          | Private, semi-private or compulsory health insurance: "Class 1", "Class 2" or "Class 3"                                                                                            |
| Stadium                                                  | solid_stad             | Categorical          | Solid tumor: "Localized N0", "Localized N+", "Locally advanced /Metastatic"                                                                                                        |
|                                                          | lymph_stad             | Categorical          | Lymphomas: A or B, I, II, III, IV                                                                                                                                                  |
| Diagnosis                                                | diagnosed              | Categorical          | "Newly diagnosed", "Relapse/ Progression", "Other"                                                                                                                                 |
| Reason for Request                                       | reason_request         | Categorical          | "Relapse from previous treatment", "Progression from current treatment", "Toxicity of current treatment", "Current treatment no longer available", "Supportive treatment", "Other" |
| Drug requested                                           | drug_name              | Alphanumeric         | Generic name of the requested drug                                                                                                                                                 |
| Continuation of treatment with previously requested drug | treatment_continuation | Logical              | Is the request for a drug that was previously requested and approved for a limited time (Y/N)                                                                                      |
| Single agent or combination                              | single_agent           | Categorical          | Will the drug be given as a single agent or in combination? "Single agent", "Drug combination"                                                                                     |
| Combination with which drug?                             | drug_combo             | Alphanumeric         | Name of the drug, that will be co-treatment to the requested drug                                                                                                                  |
| Predictive marker needed (according to LoS)              | marker_demand          | Logical              | Does the Swiss "List of specialties" (26) demand presence of a specific molecular marker? (Y/N)                                                                                    |
| Which marker?                                            | marker_name            | Alphanumeric         | Which marker does the LoS demand for treatment with the requested drug?                                                                                                            |
| Repeat biopsy at time of request                         | repeat_biopsy          | Logical              | Was a biopsy performed at the time of the request? (Y/N)                                                                                                                           |
| Biopsy result                                            | result_biopsy          | Alphanumeric         | Which marker were identified in the biopsy?                                                                                                                                        |
| Position of                                              | author_request         | Categorical          | "Head of Department", "Consultant", "Junior"                                                                                                                                       |

|                                                  |                     |                   |                                                                                                                                                                                                     |
|--------------------------------------------------|---------------------|-------------------|-----------------------------------------------------------------------------------------------------------------------------------------------------------------------------------------------------|
| requesting physician                             |                     |                   | physician", "Unknown"                                                                                                                                                                               |
| Does requesting physician provide literature?    | literature_provided | Logical           | Did the requesting physician provide any literature to the insurer in the request? (Y/N)                                                                                                            |
| Literature provided                              | literature_type     | Categorical       | Which kind of literature did the requesting physician provide with the request: "Meta-analysis", "RCT", "Prospective single arm study", "Retrospective study", "Guidelines", "Other"                |
| Claimed benefit statement                        | evidence_type       | Categorical       | What kind of benefit does the provided literature show: "OS benefit", "PFS benefit", "Tumor response benefit", "Pre-clinical"                                                                       |
| Literature details                               | comment_literature  | Alphanumeric      | Name of publication or study provided in the request                                                                                                                                                |
| <b>Correspondence</b>                            |                     |                   |                                                                                                                                                                                                     |
| Date of Letter                                   | date_letter         | Date (DD.MM.YYYY) | Date of the recorded letter                                                                                                                                                                         |
| Type of Letter                                   | type_letter         | Categorical       | What kind of correspondence is recorded: "Response from insurer", "Response from drug manufacturer", "Response from physician", "Rebuttal from physician", "Letter not found"                       |
| If rebuttal from physician, literature provided? | literature_rebut    | Logical           | Y/N                                                                                                                                                                                                 |
| Final decision                                   | final_decision      | Logical           | Is this letter the final decision for reimbursement (Y/N)                                                                                                                                           |
| Which decision?                                  | decision_type       | Categorical       | If final_decision= Y:<br>"Approval", "Disapproval"                                                                                                                                                  |
| Reason, why not final                            | reason_notfinal     | Categorical       | If final_decision= N:<br>"Insurer in negotiation with drug manufacturer", "Just notification of receipt", "Disapproval but rebuttal from physician follows", "Insurer requests further information" |
| Decision model                                   | dec_model           | Logical           | Did the insurer mention the decision aid/model                                                                                                                                                      |

|                                              |                   |                   |                                                                                                                               |
|----------------------------------------------|-------------------|-------------------|-------------------------------------------------------------------------------------------------------------------------------|
| mentioned?                                   |                   |                   | used for decision making (Y/N)                                                                                                |
| Which model?                                 | model_type        | Categorical       | "Helsana model", "9-fields model", "Nutzenbewertung", "Other"                                                                 |
| Cost coverage                                | cost_coverage     | Categorical       | "Insurance pays alone", "Pharma pays alone", "Costs split between pharma and insurance", "Patient pays alone", "Not paid for" |
| Limitations for approval                     | approval_limit    | Logical           | Did the insurer set any limitations on the approval of OLU (Y/N)                                                              |
| How is the approval limited                  | limit_type        | Categorical       | "Limited time", "Limited treatment cycles", "Limited until progression of disease", "Outpatient only", "Other"                |
| <b>Treatment characteristics</b>             |                   |                   |                                                                                                                               |
| Treatment setting Lymphoma/ Leukemia         | treat_set_lymph   | Categorical       | "Induction", "Maintenance", "Post-autologous SCT", "Post-allogeneous SCT", "Palliative"                                       |
| Treatment setting solid tumors               | treat_set_solid   | Categorical       | "Neoadjuvant", "Adjuvant", "Perioperative", "Advanced", "Other"                                                               |
| Number of previous drug treatments           | n_prev_drugs      | Integer           | How many lines of treatment did the patient receive before the request?                                                       |
| Previous treatments                          | name_prev_drugs   | Alphanumeric      | Which treatment did the patient already receive for this particular disease?                                                  |
| Which treatment did patient finally receive? | final_treatment   | Categorical       | "Requested drug treatment", "Other treatment", "No treatment", "Unclear"                                                      |
| Date available for start of treatment        | if_treatment_date | Logical           | Y/N                                                                                                                           |
| Start of treatment                           | treatment_date    | Date (DD.MM.YYYY) | If if_treatment_date=Y:<br>Date of start of treatment with requested drug                                                     |
| Patient deceased                             | patient_dead      | Logical           | Did the patient die between request and reimbursement decision (Y/N)                                                          |

**Table S1:** List of all variables extracted from patient records.
